# Supplementary material
Source: Springer Nature journal article supplement (https://www.springermedizin.de/resource/supplementary/13023_2011_303_MOESM4_ESM.pdf/9642048)

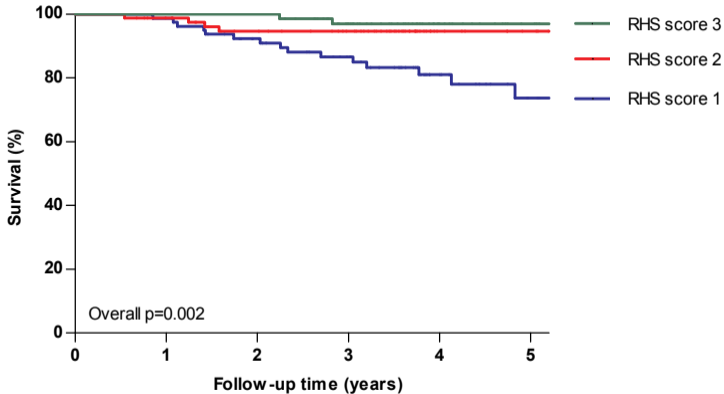

Supplement: MOESM4 [file 9642048]
